# Supplementary material for: Exercise-promoted adiponectin secretion activates autolysosomes to protect the liver of ApoE −/− mice from a high-fat diet
Source: Royal Society of Chemistry journal article supplement (doi:10.1039/d4fo02984d), 2024-01-01
Supplement: d4fo02984d1.pdf [file d4fo02984d1.pdf]

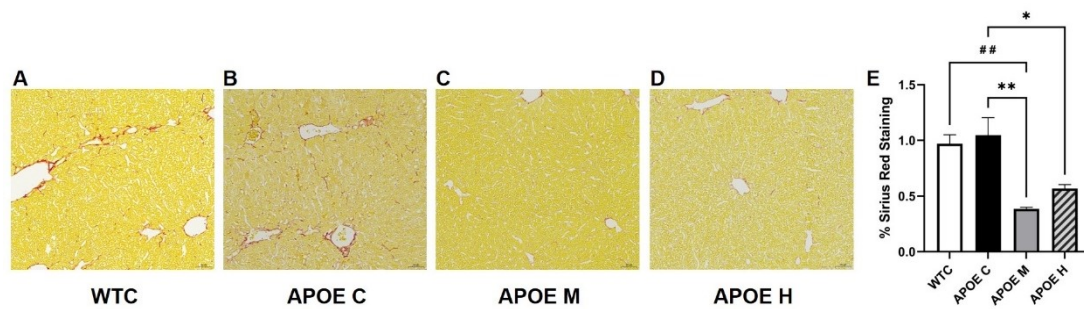

Supplementary Figure 1. Results of Sirius red staining of mouse liver. (A) Sirius red staining results in the WTC group; (B) Sirius red staining results in the APOE C group; (C) Sirius red staining results in the APOE M group; (D) Sirius red staining results in the APOE H group; (E) Quantitative analysis of Sirius red staining results. All were at 20 times magnification and scale = 50 $\mu$ m. Data are presented as means  $\pm$  SEM, n = 3 per group. Compared with the WTC group, ## $p$  < 0.01. Compared with the APOE C group, \*\* $p$  < 0.01.
